# Supplementary material
Source: PubMed Central journal article supplement (PMC3007182)
Supplement: supp_00445.2010_tableS1.pdf [file supp_00445.2010_tableS1.pdf]

1 SUPPLEMENTARY TABLE 1: Primers used for qRT-PCR

| Gene <sup>1</sup> | Forward <sup>2</sup>      | Reverse <sup>2</sup>      |
|-------------------|---------------------------|---------------------------|
| EMR1              | GCATAATCGCTGCTGGTTGA      | CCAGGCAAGGAGGACAGAGTT     |
| MCP-1             | GCTGGAGAGCTACAAGAGGATCA   | CCTCTCTCTTGAGCTTGGTGACA   |
| TNF- $\alpha$     | AGACCCTCACACTCAGATCATCTTC | CCTCCACTTGGTGGTTTGCT      |
| IL-6              | AACGATGATGCACTTGCAGA      | CCAGAGGAAATTTTCAATAGGC    |
| IGF-I             | CAGTTCGTGTGTGGACCGAG      | GCTCCGGAAGCAACACTCAT      |
| IGFBP5            | ATACAACCCAGAACGCCAGCT     | ACCTGGGCTATGCACTTGATG     |
| IGFBP3            | CCAGAACTTCTCCTCCGAGTCTAAG | CTCAGCACATTGAGGAACTTCAGAT |
| K18               | CAAGTCTGCCGAAATCAGGGAC    | TCCAAGTTGATGTTCTGGTTT     |
| 18S               | GTGGGCCTGCGGCTTAAT        | GCGAGAGTCTCGTTCGTTATC     |
| FASN              | AGAGATCCCGAGACGCTTCT      | GCCTGGTAGGCATTCTGTAGT     |
| S14               | TGAGAACGACGCTGCTGAAAC     | AGGTGGGTAAGGATGTGATGGAG   |
| SREBP-1c          | GGAGCCATGGATTGCACATT      | GCTTCCAGAGAGGAGGCC        |
| ER $\alpha$       | TGCACCATTGACAAGAACCGGA    | AGCACCCATTTTCATTTCCGGCCT  |
| ARG               | AACTCCGCTGCTACCGCTGG      | TCCACCGGCACTGTGGTCCC      |
| PR                | CAGAAGCCAGCCAGAGCC        | CACAGGTAAGCACGCCATAGT     |
| RANK              | TTGTGGAATTGGGTCAATGAT     | ACCGTCTTCTGGAACCATCTT     |
| RANKL             | GGCCACAGCGCTTCTCAG        | GAGTGACTTTATGGGAACCCGAT   |

2

3 <sup>1</sup>Primers were designed to measure the abundance of egf-like module containing mucin-like,  
4 hormone receptor-like sequence 1 (EMR1), monocyte chemoattractant protein-1 (MCP-1), TNF-  
5  $\alpha$ , IL-6, IGF-I, IGF binding protein 5 (IGFBP5), IGF binding protein 3 (IGFBP3), keratin 18  
6 (K18), 18S ribosomal RNA (18S), fatty acid synthase (FASN), thyroid hormone responsive spot  
7 14 (S14), sterol response element binding protein-1c (SREBP-1c), estrogen receptor- $\alpha$  (ER $\alpha$ ),  
8 amphiregulin (ARG), progesterone receptor (PR), receptor of activated NF- $\kappa$ B (RANK), and  
9 RANK ligand (RANKL) transcripts.

10 <sup>2</sup>Primer sequences are shown in the 5' to 3' orientation

11
